# Supplementary material
Source: publisher site journal article supplement (https://www.dovepress.com/article/467156)
Supplement: Supplementary file 1 [file get_supplementary_file.php]

**Supplementary Table 1. Baseline characteristics of included and excluded patients**

| **Variables** | | **Total**  **(N=15,166)** | **Excluded**  **(N=9,625)** | **Included**  **(N=5,541)** | ***r*-value** |
| --- | --- | --- | --- | --- | --- |
| **Demographic** | |  |  |  |  |
| Age (Mean±SD), y | | 62.2±11.3 | 62.2±11.3 | 62.3±11.3 | 0.823 |
| Male, n (%) | | 10364 (68.3) | 6518 (67.7) | 3846 (69.4) | 0.031 |
| BMI (Mean±SD) | | 24.7±3.3 | 24.7±3.3 | 24.7±3.4 | 0.753 |
| **Medical history, n (%)** | |  |  |  |  |
| History of Stroke | | 3355 (22.1) | 2187 (22.7) | 1168 (21.1) | 0.019 |
| Hypertension | | 11436 (75.4) | 7237 (75.2) | 4199 (75.8) | 0.416 |
| Diabetes mellitus | | 4542 (29.9) | 2841 (29.5) | 1701 (30.7) | 0.126 |
| Hypercholesterolemia | | 5852 (38.6) | 3709 (38.5) | 2143 (38.7) | 0.864 |
| CHD | | 1608 (10.6) | 1054 (11.0) | 554 (10.0) | 0.067 |
| Atrial fibrillation | | 1019 (6.7) | 599 (6.2) | 420 (7.6) | 0.001 |
| Current or previous  smoking | | 6660 (43.9) | 4188 (43.5) | 2472 (44.6) | 0.188 |
| Heavy drinker | | 2126 (14.0) | 1244 (12.9) | 882 (15.9) | <0.001 |
| Admission (IQR) | NIHSS, median | 3.0 (1.0–6.0) | 3.0 (1.0–6.0) | 3.0 (1.0–6.0) | <0.001 |
| Admission NIHSS, n (%) | |  |  |  | 0.018 |
| 0-5 | | 11080 (73.1) | 7104 (73.8) | 3976 (71.8) |  |
| 6- 10 | | 2965 (19.6) | 1820 (18.9) | 1145 (20.7) |  |
| >10 | | 1121 (7.4) | 701 (7.3) | 420 (7.6) |  |
| **mRS score at discharge, n (%)** | |  |  |  | <0.001 |
| 0-2 | | 12464 (82.2) | 7939 (82.5) | 4525 (81.7) |  |
| 3-5 | | 2667 (17.6) | 1652 (17.2) | 1015 (18.3) |  |
| 6 | | 35 (0.2) | 34 (0.4) | 1 (0.0) |  |
| **TOAST type, n (%)** | |  |  |  | <0.001 |
| Large-artery  atherosclerosis | | 3856 (25.4) | 2438 (25.3) | 1418 (25.6) |  |
| Cardioembolism | | 917 (6.0) | 520 (5.4) | 397 (7.2) |  |
| Small-vessel occlusion | | 3165 (20.9) | 2008 (20.9) | 1157 (20.9) |  |
| Other determined etiology | | 182 (1.2) | 97 (1.0) | 85 (1.5) |  |
| Undetermined etiology | | 7046 (46.5) | 4562 (47.4) | 2484 (44.8) |  |

Abbreviations: BMI, body mass index; CHD, coronary heart disease; NIHSS, National Institutes of Health Stroke Scale; mRS, modified Rankin Scale score; TOAST, Trial of org 10172 in acute stroke Treatment; IQR, interquartile range; and SD, standard deviation.
